# Supplementary material
Source: Springer Nature journal article supplement (https://www.springermedizin.de/resource/supplementary/12885_2011_2957_MOESM15_ESM.pdf/9462390)

# PC3-TR

0.6  $\mu$ M Mitoxantrone Alone: 31.4% (+/- 2.0)

0.2  $\mu$ M Mithramycin Alone: 18.9% (+/- 2.1)

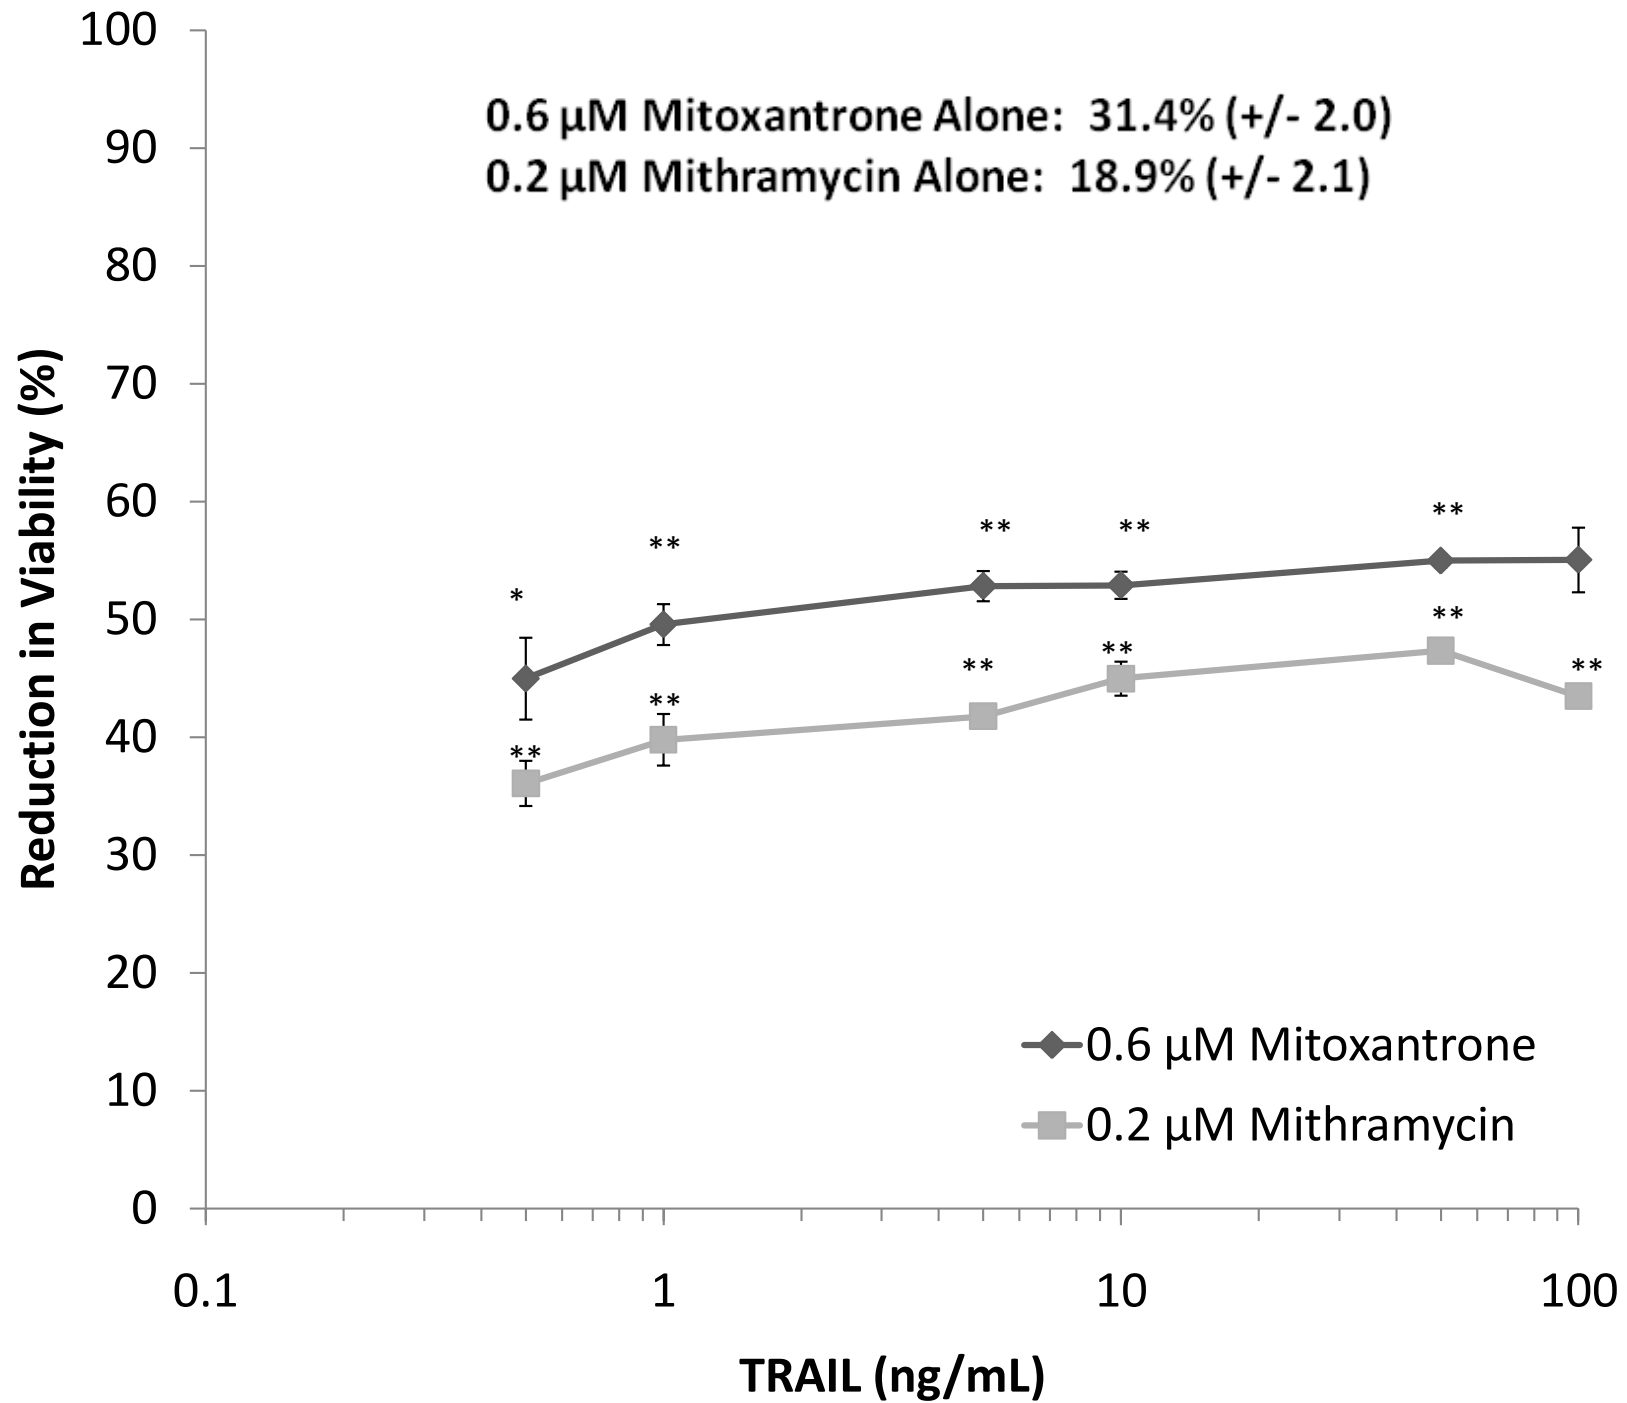

Supplement: MOESM15 [file 9462390]
